# Supplementary material for: Assessment of Firearm Storage Practices in the US, 2022
Source: PubMed Central journal article supplement (PMC9982690; doi:10.1001/jamanetworkopen.2023.1447), 2023-03-02
Supplement: jamanetwopen-e231447-s001.pdf [file jamanetwopen-e231447-s001.pdf]

## Supplementary Online Content

Anestis MD, Mocerri-Brooks J, Johnson RL, et al. Assessment of firearm storage practices in the US, 2022. *JAMA Netw Open.* 2023;6(3):e231447.  
doi:10.1001/jamanetworkopen.2023.1447

**eFigure.** Assessment Tool for Firearm-Locking Devices

This supplementary material has been provided by the authors to give readers additional information about their work.

eFigure. Assessment Tool for Firearm-Locking Devices

[If handgun OR long gun for any row in Q3] What storage/staging device(s) do you currently use for that/those firearm(s) used for [purpose]? Choose all that apply. [refer to storage chart]

| Note images are only as example and may not represent all devices in that category |                                                                                     |                                       |                                                                                       |
|------------------------------------------------------------------------------------|-------------------------------------------------------------------------------------|---------------------------------------|---------------------------------------------------------------------------------------|
| Storage Type                                                                       |                                                                                     | Type                                  | Example image                                                                         |
| <b>Unlocked</b>                                                                    |                                                                                     |                                       |                                                                                       |
| a. Unlocked, hidden                                                                |                                                                                     | b. Unlocked, not hidden               |                                                                                       |
| <b>Locking device with a key, number PIN, or dial</b>                              |                                                                                     |                                       |                                                                                       |
| c. Cable lock                                                                      |    | d. In-vehicle lock                    |    |
| e. Trigger lock                                                                    |    | f. Gun safe                           |    |
| g. Clamshell/"life jacket"                                                         |    | h. Gun cabinet                        |    |
| i. Small lock-box/hard case                                                        |   | j. Other key/PIN/dial locking device: | [describe]                                                                            |
| <b>Biometric locking device (e.g., fingerprint)</b>                                |                                                                                     |                                       |                                                                                       |
| k. Cable lock                                                                      |  | l. In-vehicle lock                    |  |
| m. Trigger lock                                                                    |  | n. Gun safe                           |  |
| o. Clamshell/"life jacket"                                                         |  | p. Gun cabinet                        |  |
| q. Small lock-box/hard case                                                        |  | r. Other biometric locking device:    | [describe]                                                                            |
