# Supplementary material for: Assessment of Firearm Storage Practices in the US, 2022
Source: PubMed Central journal article supplement (PMC9982690; doi:10.1001/jamanetworkopen.2023.1447), 2023-03-02
Supplement: jamanetwopen-e231447-s002.pdf [file jamanetwopen-e231447-s002.pdf]

## Data Sharing Statement

Anestis. Assessment of Firearm Storage Practices in the US, 2022. *JAMA Netw Open*.  
Published March 02, 2023. doi:10.1001/jamanetworkopen.2023.1447

### Data

**Data available:** No
